# Supplementary material for: Changing Patterns of Disease Severity in Blastomyces dermatitidis Infection, Quebec, Canada
Source: PubMed Central journal article supplement (PMC8544988; doi:10.3201/eid2711.210552), 2021-11
Supplement: 21-0552-Techapp-s1.pdf [file 21-0552-Techapp-s1.pdf]

# Changing Patterns of Disease Severity in *Blastomyces dermatitidis* Infection, Quebec, Canada

## Appendix

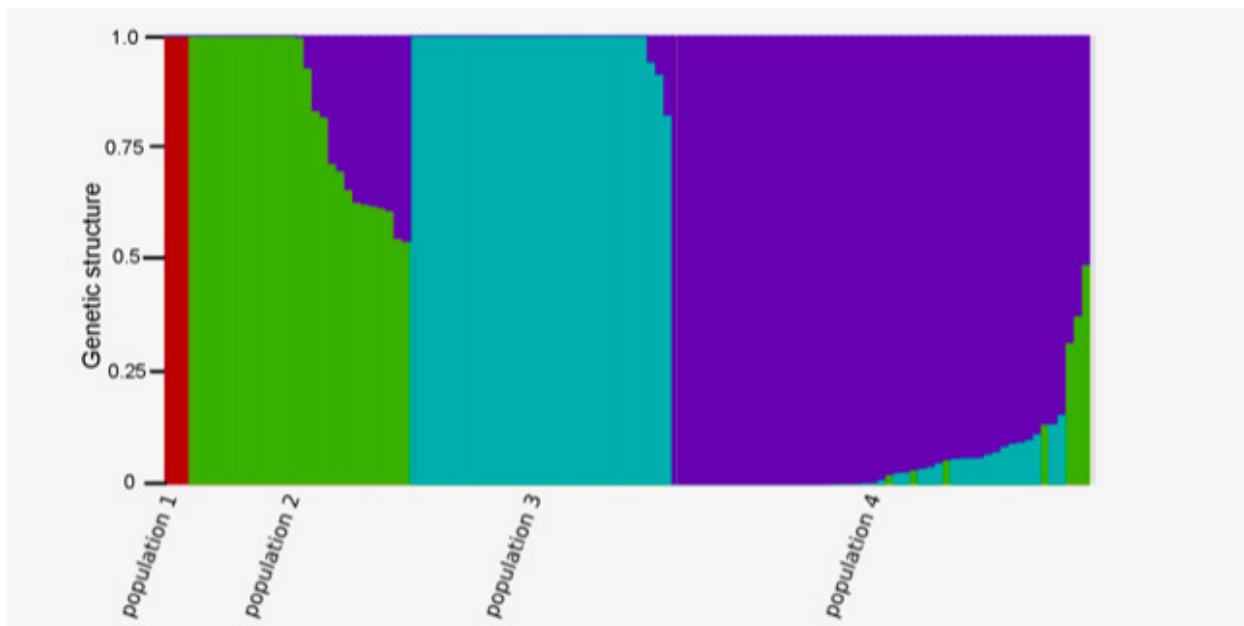

**Appendix Figure.** Population structure analysis of *Blastomyces dermatitidis* fungi based on 97,403 SNPs genotype calls across 108 strains. Each vertical line represents a strain and each color a separate population.
